# Supplementary material
Source: MDPI journal article supplement (https://www.mdpi.com/2311-7524/8/5/457)
Supplement: s1 [file s1]

**Table S1.** Primer sequences used in this work.

| Gene                        | Forward Primers (5'-3')   | Reverse Primers (5'-3')   | Amplicon (bp) | EFF% <sup>1</sup> | Concentration <sup>2</sup> (μmol/L) |
|-----------------------------|---------------------------|---------------------------|---------------|-------------------|-------------------------------------|
| <i>AMT1;1</i>               | ATCCGACGCCAACTACACTTCTAC  | CGATTGGTCACAGATGAAGTGAG   | 171           | 96.312            | 0.2                                 |
| <i>AMT1;2</i>               | AAGCGAGGATGAGACTCAAGGG    | GCAGGACTGGCATCATTAACAGG   | 138           | 99.406            | 0.2                                 |
| <i>AMT1;5</i>               | ACAGATAGTGGTAATTATAGGGTG  | CGTGGTCATGGTACACGTAAGC    | 158           | 102.381           | 0.2                                 |
| <i>AMT1;6</i>               | GTAACCTATTGTTCACCTCTGGGGC | CGTTCCTGAACGCGTCGAAT      | 135           | 107.913           | 0.2                                 |
| <i>AMT1;8</i>               | GTTGTTAGGCTCTGGAGCCATTG   | GCCTTCCCAAACGTGTCAAAC     | 129           | 97.639            | 0.4                                 |
| <i>AMT2;1</i>               | GTGACGATGGATCGATTGAGACTC  | CGCTAACAAAATAAGAGTAATAGCT | 109           | 94.450            | 0.4                                 |
| <i>AMT2;2</i>               | ATATCGGAGATGACGCGGTTC     | CGTACGCTGCTGTATTCCGAC     | 102           | 92.635            | 0.2                                 |
| <i>AMT3;1</i>               | TCACTGGCCTCGTCTGCATTAC    | GGTGTCTGCAACTGCGGATAAC    | 149           | 100.357           | 0.2                                 |
| <i>AMT4;2</i>               | GGAGGTCCCAACGTGCACAC      | CACGATGAACCGAATCAGAAAAC   | 123           | 90.869            | 0.4                                 |
| <i>AMT4;3</i>               | ATCACTGGCTTAGTTTGCATTACTC | GACTTGCTTTAGGATGCCGATT    | 141           | 108.174           | 0.2                                 |
| <i>EF-1α</i> <sup>3</sup>   | ATTCAAGTATGCCTGGGTGC      | CAGTCAGCCTGTGATGTTC       | 179           | 104.245           | 0.2                                 |
| <i>AMT1;2C</i> <sup>4</sup> | ATGGCCACTCTGACCTGCAC      | TTATGCAGGACTGGCATCATTAAC  | 1515          |                   |                                     |

<sup>1</sup> Eff% indicated the efficiency of primers.

<sup>2</sup> Concentration indicated primer concentration used to obtain the corresponding PCR efficiency.

<sup>3</sup> Served as reference gene.

<sup>4</sup> Primers used for cloning of *AMT1;2*.

**Table S2.** Correlation analysis of *AMT2;1* and *AMT2;2* expression levels during diurnal cycles.

|        |                     | AMT2;1  | AMT2;2  |
|--------|---------------------|---------|---------|
| AMT2;1 | Pearson correlation | 1       | 0.982** |
|        | Sig. (2-tailed)     |         | 0.003   |
|        | N                   | 5       | 5       |
| AMT2;2 | Pearson correlation | 0.982** | 1       |
|        | Sig. (2-tailed)     | 0.003   |         |
|        | N                   | 5       | 5       |

\*\* Correlation is significant at the 0.01 level (2-tailed).

**Table S3.** Analysis of cis-acting elements that existed in the promoters of *MdAMT* genes.

| Cis element     | Sequence    | Number of Cis-elements ( <i>MdAMTs</i> ) |     |     |     |     |     |     |     | Function                                                        |
|-----------------|-------------|------------------------------------------|-----|-----|-----|-----|-----|-----|-----|-----------------------------------------------------------------|
|                 |             | 1;2                                      | 1;4 | 1;6 | 1;8 | 2;1 | 3;1 | 4;1 | 4;3 |                                                                 |
| ABRE            | TACGGTC     | 3                                        | 2   | 0   | 3   | 0   | 1   | 1   | 0   | abscisic acid responsiveness                                    |
| ACE             | CTAACGTATT  | 0                                        | 1   | 1   | 1   | 0   | 0   | 0   | 1   | light responsiveness                                            |
| AE-box          | AGAAACAT    | 0                                        | 1   | 0   | 0   | 0   | 0   | 0   | 0   | part of a module for light response                             |
| ARE             | TGGTTT      | 2                                        | 1   | 1   | 1   | 2   |     | 1   | 6   | anaerobic induction                                             |
| ATC-motif       | AGTAATCT    | 0                                        | 0   | 0   | 0   | 0   | 0   | 0   | 1   | part of a conserved DNA module involved in light responsiveness |
| AT-rich element | ATAGAAATCAA | 1                                        | 0   | 0   | 0   | 1   | 0   | 2   | 0   | binding site of AT-rich DNA binding protein                     |
| ATCT-motif      | AATCTAATCC  | 0                                        | 0   | 0   | 1   | 0   | 0   | 0   | 1   | part of a conserved DNA module involved in light responsiveness |
| Box 4           | ATTAAT      | 3                                        | 0   | 1   | 1   | 8   | 4   | 1   | 3   | part of a conserved DNA module involved in light responsiveness |
| Box III         | CATTTACACT  | 1                                        | 0   | 0   | 0   | 0   | 0   | 2   | 0   | protein binding site                                            |
| Box-W1          | TTGACC      | 1                                        | 1   | 3   | 1   | 1   | 1   | 0   | 1   | Fungal elicitor responsive element                              |
| CAAT-box        | CAAAT       | 33                                       | 0   | 0   | 0   | 0   | 0   | 27  | 0   | common cis-acting element in promoter and enhancer regions      |
| CATT-motif      | GCATTC      | 1                                        | 0   | 0   | 1   | 0   | 0   | 0   | 0   | part of a light responsive element                              |
| CCAAT-box       | CAACGG      | 1                                        | 0   | 0   | 2   | 0   | 0   | 1   | 0   | MYBHv1 binding site                                             |
| CGTCA-motif     | CGTCA       | 0                                        | 3   | 0   | 0   | 1   | 1   | 0   | 2   | involved in the MeJA-responsiveness                             |
| EIRE            | TTCGACC     | 0                                        | 0   | 0   | 1   | 0   | 1   | 0   | 1   | elicitor-responsive element                                     |
| ELI-box3        | AAACCAATT   | 0                                        | 0   | 0   | 0   | 0   | 0   | 0   | 1   | elicitor-responsive element                                     |
| ERE             | ATTTCAAA    | 0                                        | 0   | 0   | 1   | 0   | 0   | 0   | 0   | ethylene-responsive element                                     |
| G-Box           | CACGTA      | 2                                        | 2   | 0   | 1   | 1   | 1   | 1   | 2   | involved in light responsiveness                                |
| G-box           | CACGAC      | 5                                        | 3   | 0   | 4   | 0   | 1   | 1   | 4   | involved in light responsiveness                                |

|                    |                            |   |   |   |   |   |    |   |   |                                                                |
|--------------------|----------------------------|---|---|---|---|---|----|---|---|----------------------------------------------------------------|
| GA-motif           | AAGGAAGA                   | 0 | 0 | 1 | 0 | 0 | 0  | 1 | 0 | part of a light responsive element                             |
| GAG-motif          | AGAGATG                    | 0 | 1 | 3 | 0 | 1 | 1  | 3 | 1 | part of a light responsive element                             |
| GARE-motif         | AAACAGA                    | 1 | 3 | 0 | 0 | 0 | 0  | 1 | 0 | gibberellin-responsive element                                 |
| GC-motif           | CCCCCG                     | 0 | 0 | 0 | 0 | 0 | 1  | 0 | 0 | enhancer-like element involved in anoxic specific inducibility |
| GCN4_motif         | TGTGTCA                    | 1 | 1 | 1 | 1 | 0 | 0  | 0 | 1 | involved in endosperm expression                               |
| GT1-motif          | GGTTAAT                    | 0 | 0 | 0 | 0 | 1 | 1  | 5 | 2 | light responsive element                                       |
| H-box              | ACCATTTTCACTC              | 0 | 0 | 0 | 0 | 0 | 0  | 1 | 0 | involved in light responsiveness                               |
| HD-Zip 3           | GTAAT(G/C)ATTA<br>C        | 0 | 0 | 0 | 0 | 0 | 0  | 1 | 0 | protein binding site                                           |
| HSE                | AAAAAATTTC                 | 3 | 0 | 0 | 0 | 1 | 0  | 1 | 0 | involved in heat stress responsiveness                         |
| I-box              | TATTATCTAGA                | 0 | 0 | 0 | 2 | 0 | 0  | 1 | 0 | part of a light responsive element                             |
| LAMP-<br>element   | CCAAAACCA                  | 0 | 0 | 1 | 0 | 0 | 0  | 0 | 0 | part of a light responsive element                             |
| LTR                | CCGAAA                     | 0 | 0 | 0 | 0 | 2 | 0  | 1 | 0 | low-temperature responsiveness                                 |
| MBS                | CAACTG                     | 2 | 1 | 1 | 0 | 0 | 3  | 1 | 1 | MYB binding site involved in drought-inducibility              |
| MNF1               | GTGCCC(A/T)                | 0 | 0 | 0 | 2 | 0 | 0  | 0 | 0 | light responsive element                                       |
| MRE                | AACCTAA                    | 0 | 1 | 1 | 0 | 0 | 1  | 0 | 0 | MYB binding site involved in light responsiveness              |
| O2-site            | GATGACATGG                 | 0 | 1 | 0 | 2 | 1 | 0  | 1 | 3 | zein metabolism regulation                                     |
| Skn-1_motif        | GTCAT                      | 1 | 3 | 3 | 3 | 4 | 1  | 0 | 1 | required for endosperm expression                              |
| Sp1                | CC(G/A)CCC                 | 0 | 2 | 4 | 4 | 1 | 5  | 2 | 0 | light responsive element                                       |
| RY-element         | CATGCATG                   | 1 | 0 | 0 | 0 | 0 | 0  | 0 | 1 | involved in seed-specific regulation                           |
| TA-rich region     | TATATATATATAT<br>ATATATATA | 0 | 0 | 0 | 0 | 1 | 23 | 0 | 0 | enhancer                                                       |
| TC-rich<br>repeats | ATTTTCTTCA                 | 1 | 1 | 0 | 0 | 2 | 0  | 1 | 0 | defense and stress responsiveness                              |
| TCCC-motif         | TCTCCCT                    | 0 | 0 | 2 | 0 | 0 | 0  | 0 | 1 | part of a light responsive element                             |
| TCT-motif          | TCTTAC                     | 1 | 2 | 0 | 0 | 0 | 1  | 0 | 0 | part of a light responsive element                             |
| TGA-element        | AACGAC                     | 0 | 1 | 2 | 1 | 0 | 0  | 0 | 2 | auxin-responsive element                                       |
| TGACG-motif        | TGACG                      | 0 | 3 | 0 | 0 | 1 | 1  | 0 | 2 | involved in the MeJA-responsiveness                            |
| WUN-motif          | TCATTACGAA                 | 0 | 0 | 0 | 0 | 0 | 0  | 0 | 2 | wound-responsive element                                       |
| as-2-box           | GATAatGATG                 | 0 | 0 | 0 | 1 | 0 | 0  | 0 | 0 | involved in shoot-specific expression and light responsiveness |
| chs-CMA1a          | TTACTTAA                   | 0 | 1 | 1 | 0 | 0 | 0  | 0 | 1 | part of a light responsive element                             |
| circadian          | CAAAGATATC                 | 0 | 2 | 2 | 0 | 0 | 1  | 3 | 2 | involved in circadian control                                  |
| rbcS-CMA7a         | GTCGATAAGG                 | 0 | 0 | 1 | 1 | 0 | 0  | 0 | 0 | part of a light responsive element                             |
